# Supplementary material
Source: PubMed Central journal article supplement (PMC2933037)
Supplement: NIHMS228078-supplement-supplement_1.pdf [file NIHMS228078-supplement-supplement_1.pdf]

Supplementary Table 1

*Descriptive Statistics for Lipoproteins by Sex and Age*

| Lipoproteins  | Group          |                | Cohen's <i>d</i> |
|---------------|----------------|----------------|------------------|
|               | Sex            |                |                  |
|               | Men            | Women          |                  |
| Cholesterol   |                |                |                  |
| Total         | 207.18 (44.00) | 208.53 (40.56) | -.03             |
| HDL           | 58.28 (12.92)  | 68.33 (14.71)  | -.73**           |
| Derived LDL   | 128.47 (36.43) | 125.14 (34.02) | .09**            |
| Triglycerides | 102.58 (88.34) | 75.36 (44.63)  | .39**            |
|               | Age            |                |                  |
|               | Younger        | Older          |                  |
| Cholesterol   |                |                |                  |
| Total         | 198.95 (39.79) | 227.71 (40.08) | -.72**           |
| HDL           | 63.77 (14.83)  | 64.82 (14.83)  | -.07*            |
| Derived LDL   | 119.63 (32.85) | 141.68 (35.10) | -.65**           |
| Triglycerides | 77.81 (58.24)  | 106.59 (82.11) | -.40**           |

*Note.*  $N = 5532$ . For sex,  $n = 2330$  for men and  $n = 3202$  for women. For age,  $n = 3799$  for young and  $n = 1733$  for old. Age was dichotomized at the age at which age becomes a risk factor for elevated lipoproteins, 45 for men and 55 for women.

\*  $p < .05$ .

\*\*  $p < .01$ .

Supplementary Table 2

*Regression Analyses Predicting Total, LDL, and HDL Cholesterol and Triglycerides from Personality Separately for Men and Women*

| Personality                | Cholesterol (mg/dL) |             |       | Triglycerides (mg/dL) |
|----------------------------|---------------------|-------------|-------|-----------------------|
|                            | Total               | Derived LDL | HDL   |                       |
|                            | Men                 |             |       |                       |
| Factor-level               |                     |             |       |                       |
| Neuroticism                | .02                 | .01         | .00   | .01                   |
| Extraversion               | .00                 | .00         | -.01  | .01                   |
| Openness                   | -.01                | -.03        | .00   | .05*                  |
| Agreeableness              | .00                 | .00         | .01   | -.01                  |
| Conscientiousness          | -.03                | -.02        | .01   | -.05*                 |
| Facet-level                |                     |             |       |                       |
| N3: Depression             | .00                 | -.01        | -.02  | .01                   |
| Impulsivity-related traits |                     |             |       |                       |
| N5: Impulsivity            | .04*                | .02         | .01   | .06**                 |
| E5: Excitement-seeking     | -.01                | -.02        | .03   | .00                   |
| C5: Self-Discipline        | -.02                | -.01        | .02   | -.04*                 |
| C6: Deliberation           | -.03                | -.02        | .01   | -.04*                 |
|                            | Women               |             |       |                       |
| Factor-level               |                     |             |       |                       |
| Neuroticism                | -.01                | -.01        | -.01  | .00                   |
| Extraversion               | .00                 | .00         | .00   | -.01                  |
| Openness                   | -.02                | -.02        | .00   | -.01                  |
| Agreeableness              | -.01                | -.01        | .00   | -.04*                 |
| Conscientiousness          | .03                 | .02         | .06** | -.06**                |
| Facet-level                |                     |             |       |                       |
| N3: Depression             | -.03                | -.02        | .02   | .01                   |
| Impulsivity-related traits |                     |             |       |                       |
| N5: Impulsivity            | .01                 | .00         | .00   | .02                   |
| E5: Excitement-seeking     | .01                 | .01         | -.01  | .01                   |
| C5: Self-Discipline        | .03                 | .03         | .05** | -.04*                 |
| C6: Deliberation           | .00                 | .00         | .05** | -.05**                |

*Note.*  $N = 5532$ ;  $n = 2330$  for men and  $n = 3202$  for women. Standardized regression coefficients controlling for age, age squared, education, test administration, smoking status, alcohol use, hypertension, diabetes, and BMI.

\*  $p < .05$ .

\*\*  $p < .01$ .

Supplementary Table 3

*Regression Analyses Predicting Total, LDL, and HDL Cholesterol and Triglycerides from*

*Personality Separately for Younger and Older Participants*

| Personality                | Cholesterol (mg/dL) |             |       | Triglycerides (mg/dL) |
|----------------------------|---------------------|-------------|-------|-----------------------|
|                            | Total               | Derived LDL | HDL   |                       |
|                            | Younger             |             |       |                       |
| Factor-level               |                     |             |       |                       |
| Neuroticism                | .00                 | .00         | -.01  | .02                   |
| Extraversion               | .01                 | .01         | -.01  | .02                   |
| Openness                   | -.01                | -.02        | .00   | .03                   |
| Agreeableness              | -.01                | .00         | .00   | -.04*                 |
| Conscientiousness          | .00                 | .00         | .05** | -.06**                |
| Facet-level                |                     |             |       |                       |
| N3: Depression             | -.02                | -.02        | -.02  | .02                   |
| Impulsivity-related traits |                     |             |       |                       |
| N5: Impulsivity            | .02                 | .01         | .00   | .06**                 |
| E5: Excitement-seeking     | .01                 | .01         | .00   | .02                   |
| C5: Self-Discipline        | .01                 | .01         | .04** | -.05**                |
| C6: Deliberation           | -.02                | -.02        | .03*  | -.05**                |
|                            | Older               |             |       |                       |
| Factor-level               |                     |             |       |                       |
| Neuroticism                | .00                 | .00         | .00   | .00                   |
| Extraversion               | -.01                | -.01        | .02   | -.03                  |
| Openness                   | -.03                | -.03        | -.03  | .02                   |
| Agreeableness              | -.01                | -.04        | .03   | .00                   |
| Conscientiousness          | .01                 | .02         | .03   | -.04                  |
| Facet-level                |                     |             |       |                       |
| N3: Depression             | -.02                | -.04        | .02   | .01                   |
| Impulsivity-related traits |                     |             |       |                       |
| N5: Impulsivity            | .03                 | .02         | .01   | .02                   |
| E5: Excitement-seeking     | -.01                | -.01        | .00   | -.01                  |
| C5: Self-Discipline        | .00                 | .01         | .02   | -.04                  |
| C6: Deliberation           | .01                 | .01         | .03   | -.03                  |

*Note.*  $N = 5532$ ;  $n = 3799$  for younger and  $n = 1733$  for older. Age was dichotomized at the age

at which age becomes a risk factor for elevated lipoproteins, 45 for men and 55 for women.

Standardized regression coefficients controlling for sex, age, age squared, education, test administration, smoking status, alcohol use, hypertension, diabetes, and BMI.

\*  $p < .05$ .

\*\*  $p < .01$ .
